# Supplementary material for: Toward multitasking solar desalination: a Janus and scalable paper evaporator with light trapping, heat confinement, salt resistance, and pollutant degradation
Source: Royal Society of Chemistry journal article supplement (doi:10.1039/d2ta09653f), 2023-01-01
Supplement: d2ta09653f1.pdf [file d2ta09653f1.pdf]

## Supplementary Information

### **Toward multitasking solar desalination: Janus and scalable paper evaporator with light trapping, heat confinement, salt resistance, and pollutant degradation**

Xin Wang<sup>\*a</sup>, Zilong Li<sup>a</sup>, Shuyang Xing<sup>a</sup>, Wei Kuang<sup>a</sup>, Cuihua Dong<sup>a</sup>, Yingying Liu<sup>\*b</sup>

<sup>a</sup> Faculty of Light Industry, State Key Laboratory of Biobased Material and Green Papermaking, Qilu University of Technology (Shandong Academy of Sciences), Jinan 250353, P. R. China

<sup>b</sup> Biomedical Sciences College, Shandong Medicinal Biotechnology Centre, Shandong First Medical University & Shandong Academy of Medical Sciences, Jinan 250117, Shandong, China

\* Corresponding author

\* E-mail address: wangxinpolymer@qlu.edu.cn; (Xin Wang)

#### **Contents**

**Fig. S1** XRD patterns of PDA and PDA@Fe.

**Fig. S2** <sup>1</sup>H NMR spectrum of PDMS-OH.

**Fig. S3** <sup>1</sup>H NMR spectrum of MBp monomer.

**Fig. S4** Photographs of paper samples with tensile load in dry state and wet state.

**Fig. S5** Photographs of Janus evaporators prepared from various paper substrates.

**Fig. S6** a) Curling, b) piling and c) folding behaviors of J-PDFP evaporator.

**Fig. S7** IR images of FP, PFP, PDFP and J-PDFP under a) dry state and b) operating state.

**Fig. S8** Self-cleaning property of J-PDFP evaporator.

**Fig. S9** Long-term catalytic durability of the prepared J-PDFP evaporator.

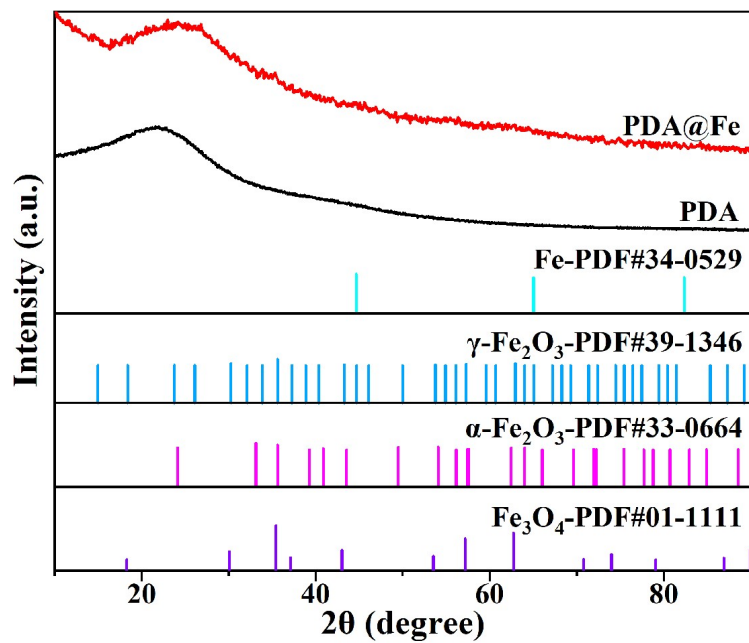

Fig. S1 XRD patterns of PDA and PDA@Fe.

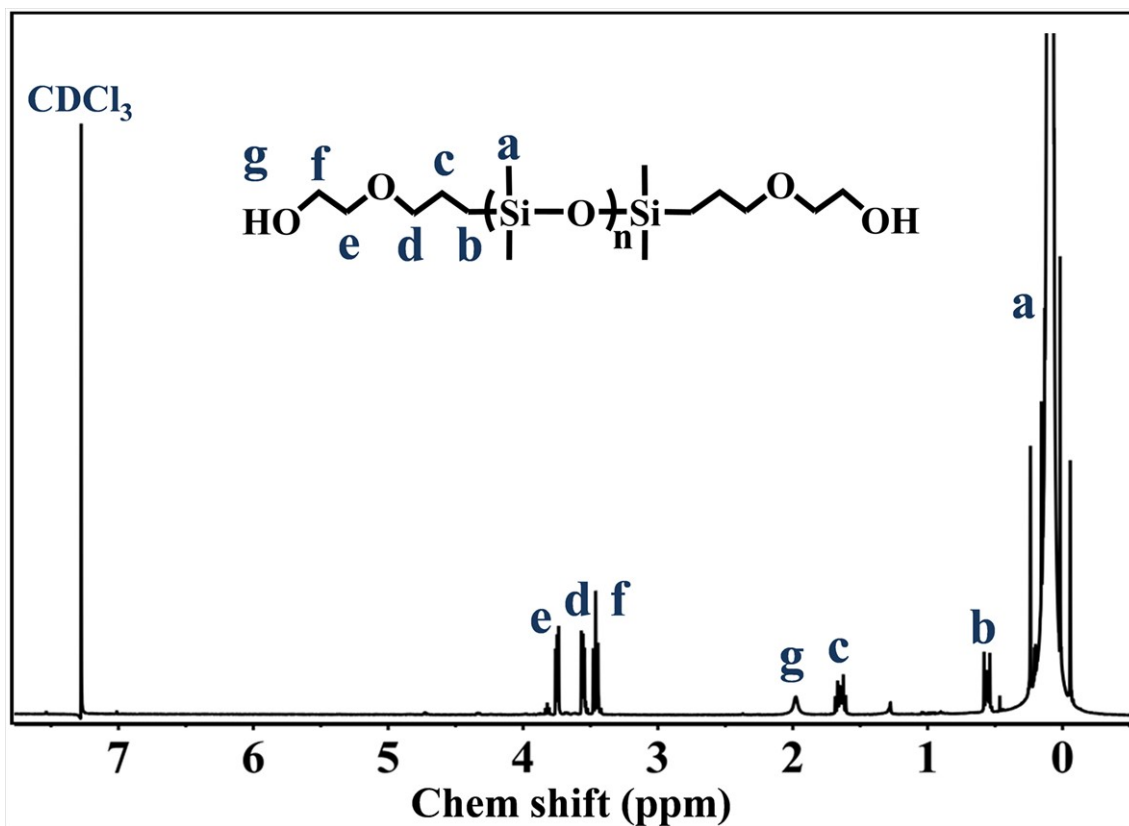

Fig. S2  $^1\text{H}$  NMR spectrum of PDMS-OH.

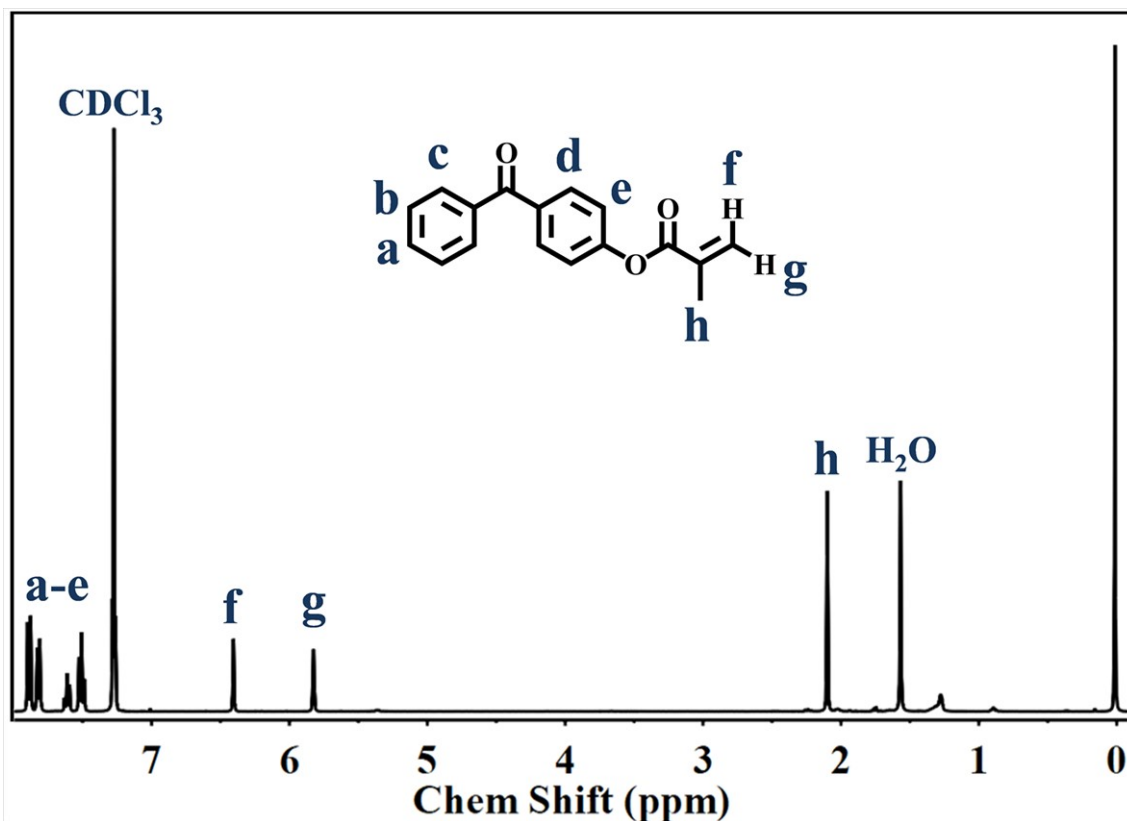

Fig. S3 <sup>1</sup>H NMR spectrum of MBp monomer.

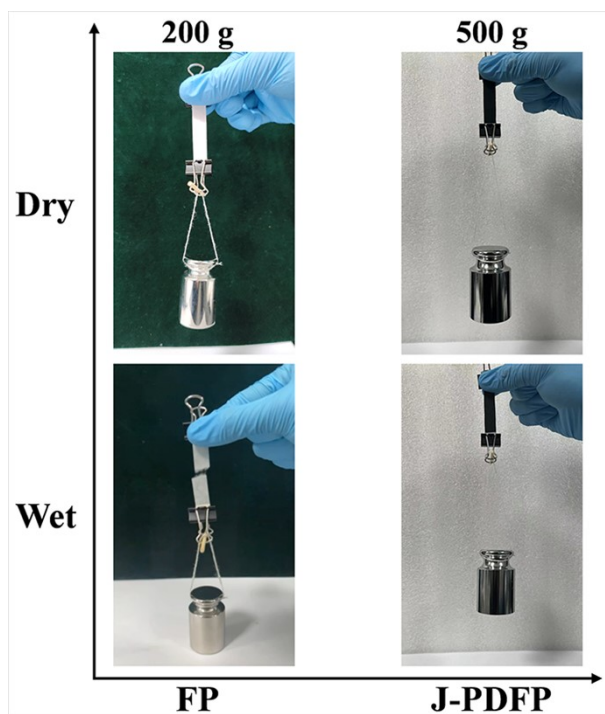

Fig. S4 Photographs of paper samples with tensile load in dry state and wet state.

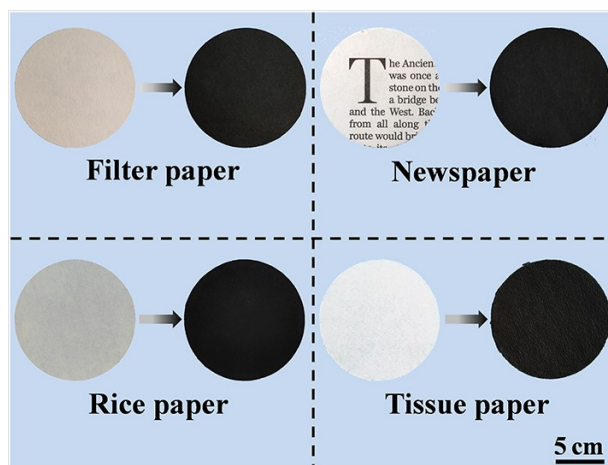

**Fig. S5** Photographs of Janus evaporators prepared from various paper substrates.

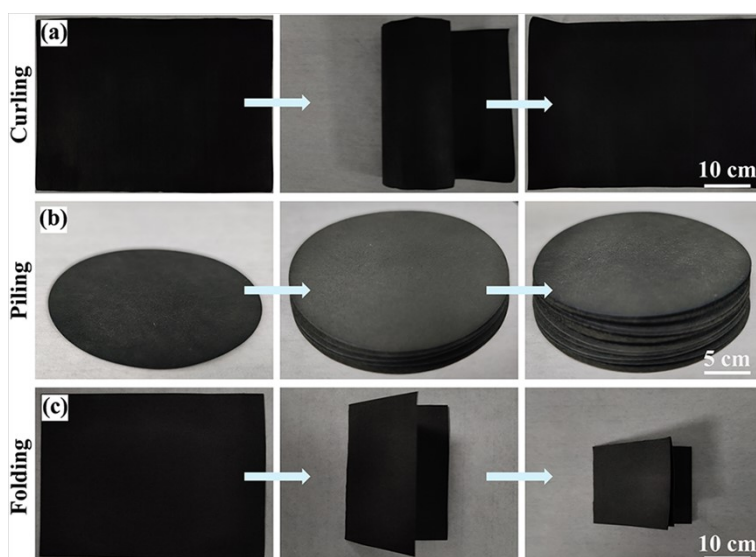

**Fig. S6** (a) Curling, (b) piling and (c) folding behaviors of J-PDFP evaporator.

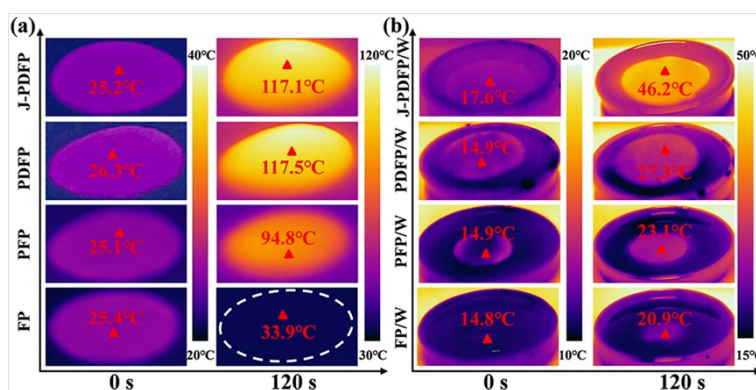

**Fig. S7** IR images of FP, PFP, PDFP and J-PDFP under dry condition (a) and operating condition (b).

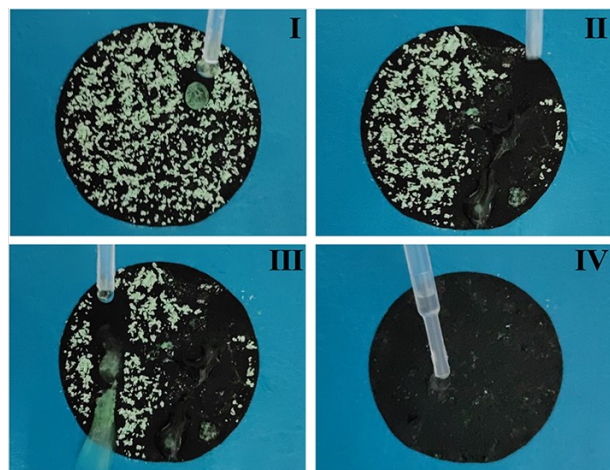

**Fig. S8** Self-cleaning property of J-PDFP evaporator.

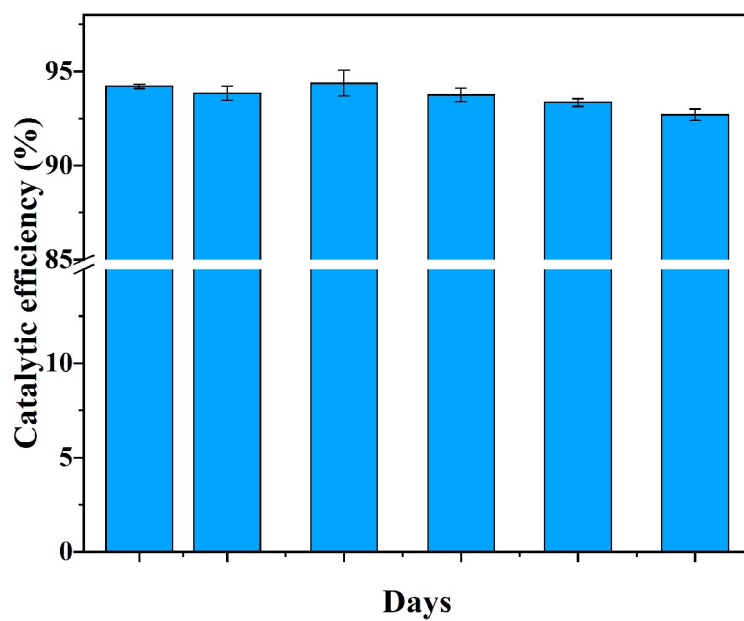

**Fig. S9** Long-term catalytic durability of the prepared J-PDFP evaporator.
